# Supplementary material for: Influence of a blend of guar gum and poly(vinyl alcohol) on long term stability, and antibacterial and antioxidant efficacies of silver nanoparticles
Source: Royal Society of Chemistry journal article supplement (doi:10.1039/c5ra08257a), 2015-01-01
Supplement: c5ra08257a1.pdf [file c5ra08257a1.pdf]

**Supporting Information**

**Influence of a blend of guar gum and poly (vinyl alcohol) on long term stability, antibacterial and antioxidant efficacies of silver nanoparticles**

Tamalika Das<sup>a</sup>, Sabina Yeasmin<sup>a</sup>, Somanjana Khatua<sup>b</sup>, Krishnendu Acharya<sup>b</sup> and Abhijit Bandyopadhyay<sup>a\*</sup>

<sup>a</sup>*Department of Polymer Science & Technology, University of Calcutta, 92, A.P.C. Road, Kolkata- 700009, West Bengal, India. Email: [abpoly@caluniv.ac.in](mailto:abpoly@caluniv.ac.in); Tel: +91 033 2350-1397/6996, ext 288*

<sup>b</sup>*Department of Botany, University of Calcutta, 35, Ballygunge Circular Road, Kolkata- 700019, West Bengal, India.*

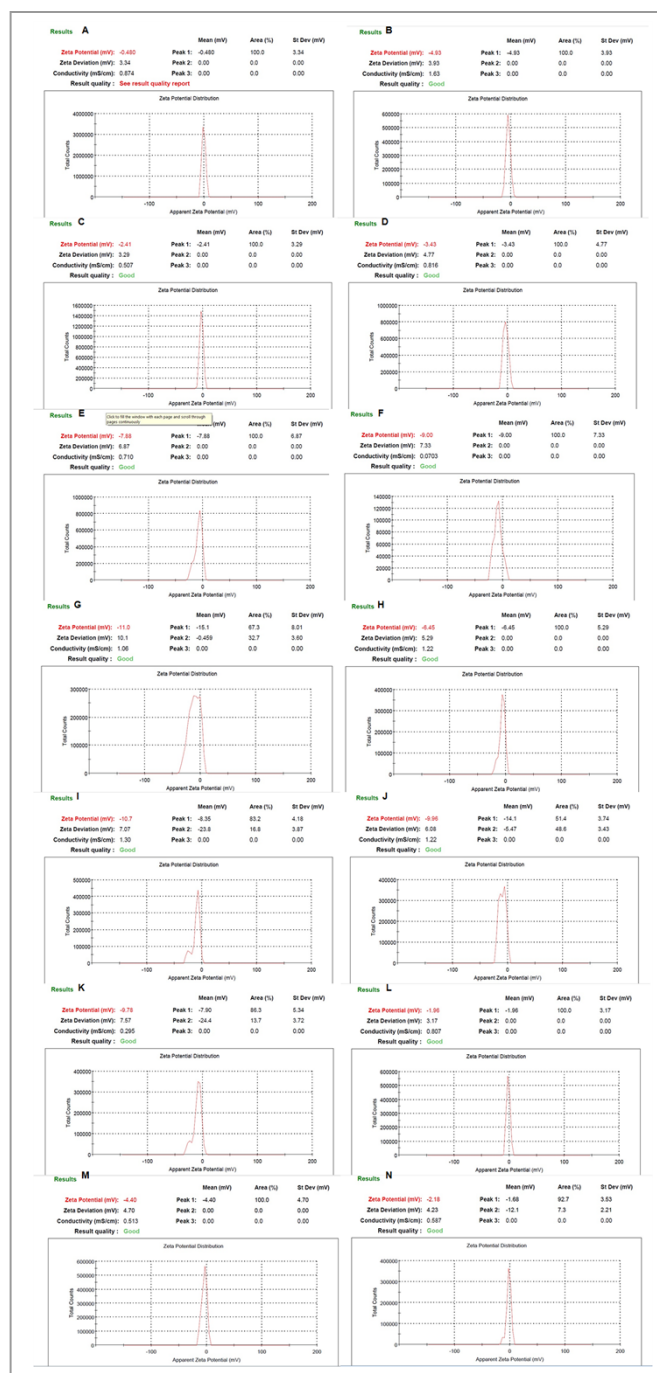

**Figure S1.** Zeta potential graphs of A-H) AgNPs<sub>100/0/6.2</sub>, AgNPs<sub>100/0/8.0</sub>, AgNPs<sub>50/100/6.1</sub>, AgNPs<sub>50/100/8.3</sub>, AgNPs<sub>30/70/6.0</sub>, AgNPs<sub>50/50/6.1</sub>, AgNPs<sub>70/30/6.1</sub> and AgNPs<sub>70/30/8.1</sub> respectively at the end of 2 hrs after completion of the reduction process I-L) AgNPs<sub>70/30/6.1</sub> at the end of 24 hrs, 7 days, 30 days and 60 days respectively from the stoppage of reduction process M-N) AgNPs<sub>50/50/6.1</sub> and AgNPs<sub>30/70/6.0</sub> respectively at the end of 30 days from the completion of reduction process

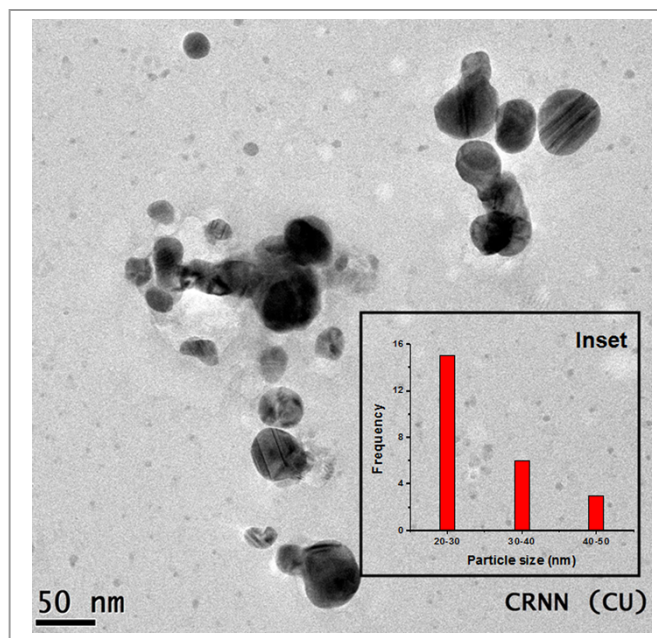

**Figure S2.** HRTEM image of dried AgNPs<sub>70/30/6.1</sub> acquired on the 60<sup>th</sup> day of the formation of AgNPs. Inset displays the particle size distribution of the respective dried AgNPs.
